# Supplementary material for: Impact of the Spectral Composition of Kilovoltage X-rays on High-Z Nanoparticle-Assisted Dose Enhancement
Source: MDPI journal article supplement (doi:10.3390/ijms22116030), 2021-06-02
Supplement: s1 [file s1]

## Impact of the spectral composition of kilovoltage X-rays on high-Z nanoparticle-assisted dose enhancement

Maria A. Kolyvanova <sup>1,2</sup>, Alexandr V. Belousov <sup>1</sup>, Grigorii A. Krusanov <sup>1</sup>, Alexandra K. Isagulieva <sup>1,3</sup>, Kirill V. Morozov<sup>4</sup>, Maria E. Kartseva<sup>5</sup>, Magomet H. Salpagarov<sup>2</sup>, Pavel V. Krivoshapkin<sup>7</sup>, Olga V. Dement`eva<sup>5</sup>, Victor M. Rudoy<sup>5</sup>, Vladimir N. Morozov <sup>2,\*</sup>

*1 – State Research Center-Burnasyan Federal Medical Biophysical Center of Federal Medical Biological Agency, 123098 Moscow, Russia; kolyvanova@physics.msu.ru (M.A.K.); belousovav@physics.msu.ru (A.V.B.); krusanov@physics.msu.ru (G.A.K.); kia2303@yandex.ru (A.K.I.); morozov.kv15@physics.msu.ru (K.V.M.); magometonco@mail.ru (M.H.S.)*

*2 – Emanuel Institute of Biochemical Physics, Russian Academy of Sciences, 119334 Moscow, Russia;*

*3 – Gause Institute of New Antibiotics, 119021 Moscow, Russia*

*4 – Department of Physics, Lomonosov Moscow State University, 119234 Moscow, Russia*

*5 – Frumkin Institute of Physical Chemistry and Electrochemistry, Russian Academy of Sciences, 119071 Moscow, Russia; Russia; maryakar@mail.ru (M.E.K.); dema\_ol@mail.ru (O.V.D. and V.M.R.)*

*6 – ITMO University, St. Petersburg 191002, Russia; krivoshapkin@scamt-itmo.ru (P.V.K.)*

*\* Correspondence: morozov.v.n@mail.ru; Tel.: +7-985-117-36-03*

**Table S1.** Characteristics of X-ray tubes and spectra generated at a fixed 30 kVp voltage.

| Spectrum number | Anode material | Filtration system       | Effective energy, keV | Average energy, keV |
|-----------------|----------------|-------------------------|-----------------------|---------------------|
| 30_1 (60)       | W              | 3.0 mm Be + 0.5 mm Al   | 16.11                 | 19.47               |
| 30_2 (64)       | W              | 0.49 mm Al              | 15.81                 | 19.27               |
| 30_3 (85)       | W              | 0.8 mm C + 0.05 mm Pd   | 18.00                 | 19.85               |
| 30_4 (86)       | Mo             | 0.8 mm C + 0.05 mm Mo   | 15.73                 | 17.15               |
| 30_5 (89)       | W              | 0.5 mm Be + 1.2 mm Al   | 19.26                 | 21.66               |
| 30_6 (90)       | Mo             | 0.5 mm Be + 0.03 mm Mo  | 14.22                 | 16.51               |
| 30_7 (91)       | Rh             | 0.5 mm Be + 0.025 mm Rh | 15.25                 | 18.00               |
| 30_8 (92)       | Mo             | 0.5 mm Be + 0.025 mm Rh | 15.23                 | 17.72               |
| 30_9 (115)      | Mo             | 0.03 mm Mo + 4.0 mm Be  | 21.86                 | 24.84               |
| 30_10 (179)     | W              | 0.52 mm Al              | 16.04                 | 19.39               |
| 30_11 (183)     | W              | 0.208 mm Al             | 12.44                 | 16.98               |
| 30_12 (184)     | W              | 0.5 mm Al               | 15.76                 | 19.27               |
| 30_13 (185)     | Mo             | 0.05 mm Ag              | 17.71                 | 19.98               |
| 30_14 (186)     | Mo             | 0.05 mm Mo              | 15.42                 | 17.10               |
| 30_15 (187)     | W              | 0.06 mm Mo              | 15.90                 | 17.28               |
| 30_16 (188)     | Mo             | 0.03 mm Mo              | 14.10                 | 16.36               |
| 30_17 (190)     | Mo             | 0.025 mm Rh             | 15.08                 | 17.61               |
| 30_18 (191)     | Mo             | 1.0 mm Al               | 18.03                 | 20.46               |
| 30_19 (192)     | Rh             | 0.025 mm Rh             | 15.05                 | 17.84               |
| 30_20 (193)     | Rh             | 1.0 mm Al               | 18.27                 | 20.73               |

**Table S2.** Characteristics of X-ray tubes and spectra generated at a fixed 35 kVp voltage.

| Spectrum number | Anode material | Filtration system | Effective energy, keV | Average energy, keV |
|-----------------|----------------|-------------------|-----------------------|---------------------|
| 35_1 (52)       | W              | 0.47 mm Al        | 16.04                 | 20.48               |
| 35_2 (250)      | Rh             | 1.0 mm Al         | 19.26                 | 22.45               |

|             |    |             |       |       |
|-------------|----|-------------|-------|-------|
| 35_3 (252)  | Rh | 0.025 mm Rh | 15.56 | 18.81 |
| 35_4 (266)  | Mo | 0.03 mm Mo  | 15.99 | 17.73 |
| 35_5 (267)  | Mo | 0.025 mm Rh | 16.51 | 18.22 |
| 35_6 (269)  | Mo | 0.5 mm Al   | 16.74 | 19.21 |
| 35_7 (270)  | Mo | 1.0 mm Al   | 16.70 | 19.21 |
| 35_8 (271)  | W  | 0.05 mm Ag  | 19.11 | 21.57 |
| 35_9 (272)  | W  | 0.5 mm Al   | 17.23 | 22.20 |
| 35_10 (273) | W  | 2.7 mm Al   | 23.90 | 26.31 |
| 35_11 (274) | W  | 0.05 mm Rh  | 18.60 | 20.64 |
| 35_12 (275) | W  | 0.7 mm Al   | 21.27 | 23.94 |
| 35_13 (276) | Mo | 3.0 mm Al   | 21.08 | 24.61 |
| 35_14 (278) | Rh | 3.0 mm Al   | 21.80 | 24.30 |

**Table S3.** Characteristics of X-ray tubes and spectra generated at a fixed 40 kVp voltage.

| Spectrum number | Anode material | Filtration system       | Effective energy, keV | Average energy, keV |
|-----------------|----------------|-------------------------|-----------------------|---------------------|
| 40_1 (18)       | W              | 0.04 mm Pd              | 18.87                 | 22.27               |
| 40_2 (53)       | W              | 0.56 mm Al              | 17.63                 | 23.23               |
| 40_3 (59)       | W              | 3.0 mm Be + 0.8 mm Al   | 19.51                 | 24.46               |
| 40_4 (65)       | W              | 0.49 mm Al              | 16.93                 | 22.66               |
| 40_5 (128)      | Mo             | 0.025 mm Rh + 2.0 mm Al | 23.11                 | 27.22               |
| 40_6 (135)      | W              | 2.5 mm Al               | 25.33                 | 28.46               |
| 40_7 (136)      | W              | 0.5 mm Al               | 18.18                 | 24.13               |
| 40_8 (138)      | W              | 0.05 mm Rh              | 19.07                 | 21.98               |
| 40_9 (141)      | Rh             | 3.0 mm Al               | 24.29                 | 27.62               |
| 40_10 (142)     | Mo             | 3.0 mm Al               | 22.69                 | 27.23               |
| 40_11 (143)     | W              | 0.05 mm Ag              | 19.72                 | 22.74               |
| 40_12 (145)     | W              | 0.05 mm Ag + 2.0 mm Al  | 22.89                 | 26.04               |
| 40_13 (242)     | Mo             | 1.0 mm Al               | 19.43                 | 23.79               |
| 40_14 (243)     | Rh             | 1.0 mm Al               | 19.95                 | 24.04               |
| 40_15 (244)     | Rh             | 0.025 mm Rh             | 19.42                 | 23.79               |
| 40_16 (245)     | Mo             | 0.03 mm Mo              | 19.44                 | 23.79               |
| 40_17 (246)     | Mo             | 0.025 mm Mo             | 14.22                 | 18.16               |
| 40_18 (247)     | Rh             | 0.025 mm Rh + 2.0 mm Al | 21.96                 | 25.36               |
| 40_19 (248)     | W              | 0.8 mm Al               | 19.31                 | 24.25               |
| 40_20 (249)     | W              | 4.0 mm Be + 0.5 mm Al   | 17.20                 | 22.87               |
| 40_21 (251)     | W              | 1.0 mm Al               | 20.33                 | 24.99               |
| 40_22 (279)     | W              | 0.06 mm Mo              | 17.14                 | 21.18               |

**Table S4.** Characteristics of X-ray tube and spectrum generated at a fixed 45 kVp voltage.

| Spectrum number | Anode material | Filtration system | Effective energy, keV | Average energy, keV |
|-----------------|----------------|-------------------|-----------------------|---------------------|
| 45_1 (54)       | W              | 0.74 mm Al        | 19.50                 | 25.84               |

**Table S5.** Characteristics of X-ray tubes and spectra generated at a fixed 50 kVp voltage.

| Spectrum number | Anode material | Filtration system      | Effective energy, keV | Average energy, keV |
|-----------------|----------------|------------------------|-----------------------|---------------------|
| 50_1 (31)       | W              | 0.5 mm Be              | 6.22                  | 15.53               |
| 50_2 (55)       | W              | 1.01 mm Al             | 21.64                 | 28.31               |
| 50_3 (58)       | W              | 3.0 mm Be + 1.0 mm Al  | 21.85                 | 28.56               |
| 50_4 (66)       | W              | 0.96 mm Al             | 6.68                  | 21.59               |
| 50_5 (84)       | W              | 0.8 mm C + 1.0 mm Ba   | 19.59                 | 24.79               |
| 50_6 (88)       | Sb             | 0.8 mm C + 0.2 mm Sb   | 24.97                 | 27.53               |
| 50_7 (93)       | W              | 3.0 mm Be + 1.65 mm Al | 24.58                 | 30.46               |
| 50_8 (130)      | W              | 0.05 mm Rh             | 19.77                 | 25.66               |
| 50_9 (131)      | Mo             | 3.0 mm Al              | 24.60                 | 31.17               |
| 50_10 (132)     | Rh             | 3.0 mm Al              | 24.34                 | 30.07               |

|             |    |                         |       |       |
|-------------|----|-------------------------|-------|-------|
| 50_11 (206) | W  | 1.0 mm Al               | 21.54 | 28.37 |
| 50_12 (221) | W  | 0.25 mm Al              | 14.45 | 23.37 |
| 50_13 (222) | W  | 0.04 mm Ag              | 18.74 | 24.07 |
| 50_14 (223) | W  | 0.5 mm Al               | 18.00 | 25.82 |
| 50_15 (224) | W  | 2.5 mm Al               | 26.91 | 32.06 |
| 50_16 (225) | W  | 0.04 mm Ag + 2.0 mm Al  | 24.51 | 30.40 |
| 50_17 (226) | W  | 0.04 mm Pd              | 18.54 | 23.91 |
| 50_18 (227) | W  | 0.04 mm Pd + 2.0 mm Al  | 24.06 | 30.91 |
| 50_19 (228) | W  | 0.05 mm Mo              | 16.64 | 23.17 |
| 50_20 (229) | W  | 0.05 mm Mo + 2.0 mm Al  | 25.24 | 34.15 |
| 50_21 (230) | W  | 0.06 mm Mo              | 17.09 | 23.53 |
| 50_22 (231) | W  | 0.06 mm Mo + 2.0 mm Al  | 25.57 | 34.58 |
| 50_23 (232) | W  | 1.65 mm Al              | 24.45 | 30.35 |
| 50_24 (233) | W  | 2.46 mm Al              | 26.81 | 32.00 |
| 50_25 (234) | Mo | 0.03 mm Mo              | 15.25 | 20.68 |
| 50_26 (235) | Mo | 0.03 mm Mo + 2.0 mm Al  | 23.51 | 31.75 |
| 50_27 (236) | Mo | 0.025 mm Rh             | 16.33 | 21.54 |
| 50_28 (237) | Mo | 0.025 mm Rh + 2.0 mm Al | 23.25 | 30.22 |
| 50_29 (238) | Rh | 0.025 mm Rh             | 16.58 | 21.95 |
| 50_30 (239) | Rh | 0.025 mm Rh + 2.0 mm Al | 23.37 | 29.84 |
| 50_31 (240) | Rh | 1.0 mm Al               | 20.69 | 26.79 |
| 50_32 (241) | Mo | 1.0 mm Al               | 20.18 | 26.68 |
| 50_33 (280) | W  | 0.05 mm Ag              | 20.44 | 25.93 |
| 50_34 (281) | W  | 0.05 mm Ag + 2.0 mm Al  | 24.84 | 31.21 |
| 50_35 (282) | W  | 0.05 mm Rh + 2.0 mm Al  | 24.73 | 32.72 |
| 50_36 (283) | W  | 4.0 mm Al               | 29.76 | 34.16 |

**Table S6.** Characteristics of X-ray tube and spectrum generated at a fixed 55 kVp voltage.

| Spectrum number | Anode material | Filtration system      | Effective energy, keV | Average energy, keV |
|-----------------|----------------|------------------------|-----------------------|---------------------|
| 55_1 (29)       | W              | 1.0 mm Be + 0.78 mm Al | 6.30                  | 16.61               |

**Table S7.** Characteristics of X-ray tubes and spectra generated at a fixed 60 kVp voltage.

| Spectrum number | Anode material | Filtration system        | Effective energy, keV | Average energy, keV |
|-----------------|----------------|--------------------------|-----------------------|---------------------|
| 60_1 (27)       | W              | 0.5 mm Be                | 6.38                  | 17.68               |
| 60_2 (120)      | W              | 3.2 mm Al                | 30.48                 | 36.99               |
| 60_3 (121)      | W              | 3.9 mm Al                | 31.37                 | 37.58               |
| 60_4 (123)      | W              | 0.3 mm Cu + 4.0 mm Al    | 32.68                 | 44.18               |
| 60_5 (125)      | W              | 18.7 mm Al               | 40.57                 | 45.39               |
| 60_6 (127)      | W              | 0.6 mm Cu + 4.0 mm Al    | 44.22                 | 47.35               |
| 60_7 (152)      | W              | 0.4 mm Be                | 6.15                  | 18.31               |
| 60_8 (196)      | W              | 2.68 mm Al               | 28.76                 | 35.82               |
| 60_9 (199)      | W              | 0.4 mm Be + 0.015 mm V   | 6.15                  | 18.32               |
| 60_10 (200)     | W              | 0.4 mm Be + 0.0015 mm Fe | 6.37                  | 18.41               |
| 60_11 (201)     | W              | 0.4 mm Be + 0.005 mm Mn  | 6.48                  | 20.30               |
| 60_12 (202)     | W              | 0.4 mm Be + 0.015 mm Ni  | 15.89                 | 28.36               |
| 60_13 (203)     | W              | 0.4 mm Be + 0.075 mm Zr  | 15.89                 | 28.36               |
| 60_14 (277)     | W              | 4.0 mm Al + 0.6 mm Cu    | 44.81                 | 47.43               |

**Table S8.** Characteristics of X-ray tubes and spectra generated at a fixed 70 kVp voltage.

| Spectrum number | Anode material | Filtration system       | Effective energy, keV | Average energy, keV |
|-----------------|----------------|-------------------------|-----------------------|---------------------|
| 70_1 (44)       | W              | 1.65 mm Al              | 23.61                 | 34.25               |
| 70_2 (57)       | W              | 3.0 mm Be + 4.0 mm Al   | 33.44                 | 41.29               |
| 70_3 (75)       | W              | 4.0 mm Al               | 33.51                 | 41.15               |
| 70_4 (118)      | W              | 2. 83 mm Al + 1.5 mm Cu | 47.94                 | 57.18               |

|            |   |            |       |       |
|------------|---|------------|-------|-------|
| 70_5 (220) | W | 2.83 mm Al | 30.78 | 39.28 |
|------------|---|------------|-------|-------|

**Table S9.** Characteristics of X-ray tubes and spectra generated at a fixed 75 kVp voltage.

| Spectrum number | Anode material | Filtration system     | Effective energy, keV | Average energy, keV |
|-----------------|----------------|-----------------------|-----------------------|---------------------|
| 75_1 (94)       | W              | 3.0 mm Be + 2.4 mm Al | 27.44                 | 38.26               |
| 75_2 (219)      | W              | 2.4 mm Al             | 30.06                 | 39.98               |

**Table S10.** Characteristics of X-ray tubes and spectra generated at a fixed 80 kVp voltage.

| Spectrum number | Anode material | Filtration system     | Effective energy, keV | Average energy, keV |
|-----------------|----------------|-----------------------|-----------------------|---------------------|
| 80_1 (25)       | W              | w/o filtration        | 2.48                  | 19.85               |
| 80_2 (35)       | W              | 0.8 mm Al             | 48.21                 | 53.39               |
| 80_3 (67)       | W              | 1.02 mm Al            | 24.46                 | 37.07               |
| 80_4 (96)       | W              | 3.0 mm Al             | 32.13                 | 47.58               |
| 80_5 (116)      | W              | 7.2 mm Al             | 40.20                 | 47.93               |
| 80_6 (204)      | W              | 2.0 mm Cu + 4.0 mm Al | 54.39                 | 64.98               |
| 80_7 (205)      | W              | 0.5 mm Cu + 4.0 mm Al | 44.88                 | 56.40               |
| 80_8 (207)      | W              | 2.99 mm Al            | 32.48                 | 42.77               |

**Table S11.** Characteristics of X-ray tubes and spectra generated at a fixed 90 kVp voltage.

| Spectrum number | Anode material | Filtration system | Effective energy, keV | Average energy, keV |
|-----------------|----------------|-------------------|-----------------------|---------------------|
| 90_1 (22)       | W              | 3.0 mm Al         | 7.25                  | 24.68               |
| 90_2 (23)       | W              | 2.5 mm Al         | 7.25                  | 24.67               |
| 90_3 (24)       | W              | 2.0 mm Al         | 7.25                  | 24.67               |
| 90_4 (214)      | W              | 6.36 mm Al        | 34.46                 | 46.15               |

**Table S12.** Characteristics of X-ray tubes and spectra generated at a fixed 100 kVp voltage.

| Spectrum number | Anode material | Filtration system      | Effective energy, keV | Average energy, keV |
|-----------------|----------------|------------------------|-----------------------|---------------------|
| 100_1 (19)      | W              | 1.0 mm Be + 2.0 mm Al  | 7.33                  | 26.93               |
| 100_2 (20)      | W              | 1.0 mm Be + 0.78 mm Cu | 7.33                  | 26.92               |
| 100_3 (21)      | W              | 2.2 mm Be + 1.0 mm Cu  | 7.33                  | 26.92               |
| 100_4 (37)      | W              | 1.0 mm Cu + 1.8 mm Al  | 27.82                 | 47.80               |
| 100_5 (43)      | W              | 2.1 mm Al              | 31.95                 | 46.27               |
| 100_6 (56)      | W              | 3.0 mm Be + 4.5 mm Al  | 39.65                 | 51.30               |
| 100_7 (68)      | W              | 2.03 mm Al             | 31.68                 | 46.07               |
| 100_8 (76)      | W              | 4.5 mm Al              | 39.63                 | 51.09               |
| 100_9 (95)      | W              | 3.0 mm Be + 3.1 mm Al  | 30.25                 | 45.17               |
| 100_10 (103)    | W              | 0.5 mm Cu + 1.0 mm Al  | 14.32                 | 34.45               |
| 100_11 (104)    | W              | 0.6 mm Cu + 4.0 mm Al  | 53.26                 | 65.00               |
| 100_12 (194)    | W              | 4.4 mm Al              | 39.10                 | 50.89               |
| 100_13 (195)    | W              | 3.0 mm Be + 3.4 mm Al  | 38.81                 | 50.75               |
| 100_14 (197)    | W              | 3.506 mm Al            | 36.76                 | 49.42               |
| 100_15 (212)    | W              | 0.2 mm Cu + 3.4 mm Al  | 42.11                 | 57.55               |
| 100_16 (216)    | W              | 3.1 mm Al              | 35.57                 | 48.63               |
| 100_17 (217)    | W              | 3.36 mm Al             | 36.24                 | 49.14               |
| 100_18 (218)    | W              | 0.15 mm Cu + 3.9 mm Al | 39.98                 | 56.37               |
| 100_19 (255)    | W              | w/o filtration         | 2.75                  | 23.90               |
| 100_20 (256)    | W              | 0.5 mm Al              | 20.97                 | 38.80               |
| 100_21 (257)    | W              | 1.0 mm Al              | 25.81                 | 42.04               |
| 100_22 (265)    | W              | 2.0 mm Cu + 3.36 mm Al | 63.33                 | 73.17               |

**Table S13.** Characteristics of X-ray tubes and spectra generated at a fixed 110 kVp voltage.

| Spectrum number | Anode material | Filtration system     | Effective energy, keV | Average energy, keV |
|-----------------|----------------|-----------------------|-----------------------|---------------------|
| 110_1 (113)     | W              | 1.3 mm Cu + 5.5 mm Al | 65.88                 | 75.62               |
| 110_2 (114)     | W              | 1.5 mm Cu + 2.0 mm Al | 66.90                 | 76.27               |
| 110_3 (211)     | W              | 2.0 mm Cu + 4.0 mm Al | 71.40                 | 79.41               |

**Table S14.** Characteristics of X-ray tubes and spectra generated at a fixed 120 kVp voltage.

| Spectrum number | Anode material | Filtration system                 | Effective energy, keV | Average energy, keV |
|-----------------|----------------|-----------------------------------|-----------------------|---------------------|
| 120_1 (17)      | W              | 2.5 mm Al                         | 7.46                  | 31.23               |
| 120_2 (38)      | W              | 0.3 mm Cu + 1.1 mm Al             | 30.22                 | 52.53               |
| 120_3 (39)      | W              | 1.0 mm Cu + 0.2 mm Al             | 63.91                 | 75.49               |
| 120_4 (69)      | W              | 4.0 mm Al                         | 40.82                 | 55.04               |
| 120_5 (77)      | W              | 6.0 mm Al                         | 28.03                 | 47.13               |
| 120_6 (208)     | W              | 0.29 mm Cu + 3.7 mm Al            | 49.91                 | 65.50               |
| 120_7 (209)     | W              | 3.73 mm Al                        | 40.22                 | 54.58               |
| 120_8 (263)     | W              | 1.0 mm Sn + 5.0 mm Cu + 4.0 mm Al | 67.19                 | 71.96               |

**Table S15.** Characteristics of X-ray tubes and spectra generated at a fixed 125 kVp voltage.

| Spectrum number | Anode material | Filtration system     | Effective energy, keV | Average energy, keV |
|-----------------|----------------|-----------------------|-----------------------|---------------------|
| 125_1 (210)     | W              | 3.3 mm Cu + 3.6 mm Al | 84.55                 | 91.71               |
| 125_2 (213)     | W              | 4.2 mm Cu             | 88.48                 | 94.15               |
| 125_3 (215)     | W              | 0.1 mm Cu + 2.5 mm Al | 46.87                 | 59.51               |

**Table S16.** Characteristics of X-ray tube and spectrum generated at a fixed 135 kVp voltage.

| Spectrum number | Anode material | Filtration system         | Effective energy, keV | Average energy, keV |
|-----------------|----------------|---------------------------|-----------------------|---------------------|
| 135_1 (182)     | W              | 0.222 mm Cu + 2.302 mm Al | 48.79                 | 66.51               |

**Table S17.** Characteristics of X-ray tube and spectrum generated at a fixed 140 kVp voltage.

| Spectrum number | Anode material | Filtration system | Effective energy, keV | Average energy, keV |
|-----------------|----------------|-------------------|-----------------------|---------------------|
| 140_1 (78)      | W              | 9.0 mm Al         | 53.80                 | 65.21               |

**Table S18.** Characteristics of X-ray tubes and spectra generated at a fixed 150 kVp voltage.

| Spectrum number | Anode material | Filtration system                   | Effective energy, keV | Average energy, keV |
|-----------------|----------------|-------------------------------------|-----------------------|---------------------|
| 150_1 (14)      | W              | 0.6 mm Cu                           | 7.64                  | 37.26               |
| 150_2 (15)      | W              | 0.5 mm Ti + 2.0 mm H <sub>2</sub> O | 7.65                  | 37.26               |
| 150_3 (16)      | W              | 2.2 mm Be + 4.0 mm Al               | 7.65                  | 37.26               |
| 150_4 (70)      | W              | 0.3 mm Cu + 1.2 mm Al               | 61.17                 | 71.46               |
| 150_5 (79)      | W              | 0.5 mm Cu + 4.0 mm Al               | 63.66                 | 77.73               |
| 150_6 (97)      | W              | 1.5 mm Al                           | 33.65                 | 54.82               |
| 150_7 (98)      | W              | 0.1 mm Cu + 0.3 mm Al               | 35.87                 | 61.43               |
| 150_8 (105)     | W              | 0.2 mm Cu + 0.5 mm Al               | 46.90                 | 67.47               |
| 150_9 (106)     | W              | 0.2 mm Cu + 5.0 mm Al               | 53.23                 | 70.97               |
| 150_10 (111)    | W              | 2.2 mm Cu                           | 87.96                 | 95.77               |
| 150_11 (112)    | W              | 1.1 mm Cu                           | 73.86                 | 85.65               |
| 150_12 (170)    | W              | 0.3 mm Cu + 4.4 mm Al               | 56.94                 | 73.43               |
| 150_13 (171)    | W              | 4.38 mm Al                          | 46.03                 | 61.91               |

|              |   |                        |        |        |
|--------------|---|------------------------|--------|--------|
| 150_14 (172) | W | 2.5 mm Sn + 4.0 mm Al  | 103.39 | 115.69 |
| 150_15 (173) | W | 1.0 mm Sn + 4.38 mm Al | 87.81  | 106.42 |
| 150_16 (177) | W | 0.53 mm Cu + 4.0 mm Al | 22.38  | 52.93  |
| 150_17 (178) | W | 1.01 mm Cu             | 21.13  | 47.89  |
| 150_18 (180) | W | 0.9 mm Cu + 1.0 mm Al  | 71.23  | 83.50  |
| 150_19 (181) | W | 0.5 mm Cu + 4.5 mm Al  | 63.37  | 77.86  |
| 150_20 (253) | W | 49.4 mm Al             | 76.05  | 81.44  |

**Table S19.** Characteristics of X-ray tube and spectrum generated at a fixed 160 kVp voltage.

| Spectrum number | Anode material | Filtration system | Effective energy, keV | Average energy, keV |
|-----------------|----------------|-------------------|-----------------------|---------------------|
| 160_1 (13)      | W              | 1.0 mm Be         | 7.71                  | 39.18               |

**Table S20.** Characteristics of X-ray tubes and spectra generated at a fixed 180 kVp voltage.

| Spectrum number | Anode material | Filtration system      | Effective energy, keV | Average energy, keV |
|-----------------|----------------|------------------------|-----------------------|---------------------|
| 180_1 (12)      | W              | 0.15 mm Cu + 2.5 mm Al | 7.79                  | 42.88               |
| 180_2 (42)      | W              | 0.35 mm Cu + 1.5 mm Al | 69.24                 | 79.56               |
| 180_3 (99)      | W              | 5.5 mm Be + 1.0 mm Al  | 33.39                 | 58.50               |
| 180_4 (100)     | W              | 3.0 mm Be + 2.3 mm Al  | 42.12                 | 63.38               |
| 180_5 (169)     | W              | 0.53 mm Cu + 6.0 mm Al | 71.15                 | 86.14               |

**Table S21.** Characteristics of X-ray tubes and spectra generated at a fixed 200 kVp voltage.

| Spectrum number | Anode material | Filtration system                             | Effective energy, keV | Average energy, keV |
|-----------------|----------------|-----------------------------------------------|-----------------------|---------------------|
| 200_1 (8)       | W              | 0.8 mm Be                                     | 7.85                  | 46.40               |
| 200_2 (9)       | W              | 7.0 mm Be + 0.5 mm Cu                         | 7.84                  | 46.35               |
| 200_3 (10)      | W              | 7.0 mm Be + 0.6 mm Cu                         | 7.86                  | 46.38               |
| 200_4 (11)      | W              | 0.6 mm Cu                                     | 7.85                  | 46.40               |
| 200_5 (71)      | W              | 1.2 mm Cu + 4.0 mm Al                         | 97.07                 | 101.23              |
| 200_6 (80)      | W              | 1.0 mm Cu + 4.0 mm Al                         | 86.76                 | 98.73               |
| 200_7 (149)     | W              | 1.15 mm Cu + 4.0 mm Al                        | 20.42                 | 67.93               |
| 200_8 (155)     | W              | 2.0 mm Sn + 4.0 mm Al                         | 27.16                 | 66.50               |
| 200_9 (156)     | W              | 0.99 mm Cu + 6.0 mm Al                        | 31.96                 | 72.73               |
| 200_10 (161)    | W              | 0.5 mm Cu + 2.0 mm Al                         | 24.47                 | 60.85               |
| 200_11 (262)    | W              | 1.0 mm Pb + 3.0 mm Sn + 2.0 mm Cu + 4.0 mm Al | 131.10                | 140.03              |
| 200_12 (268)    | W              | 4.0 mm Al + 2.0 mm Cu + 3.0 mm Sn + 1.0 mm Pb | 159.66                | 161.53              |
| 200_13 (P)      | W              | 1.0 mm Al + 1.0 mm Cu                         | 88.09                 | 94.17               |
| 200_14 (R)      | W              | 2.5 mm Glass + 1.5 mm Al                      | 53.67                 | 64.72               |
| 200_15 (X)      | W              | 1.0 mm Al + 0.45 mm Cu                        | 72.62                 | 82.69               |

**Table S22.** Characteristics of X-ray tubes and spectra generated at a fixed 205 kVp voltage.

| Spectrum number | Anode material | Filtration system     | Effective energy, keV | Average energy, keV |
|-----------------|----------------|-----------------------|-----------------------|---------------------|
| 205_1 (101)     | W              | 1.0 mm Be + 0.1 mm Al | 44.86                 | 67.68               |
| 205_2 (102)     | W              | 5.5 mm Be + 0.1 mm Al | 18.11                 | 54.75               |

**Table S22.** Characteristics of X-ray tubes and spectra generated at a fixed 210 kVp voltage.

| Spectrum number | Anode material | Filtration system     | Effective energy, keV | Average energy, keV |
|-----------------|----------------|-----------------------|-----------------------|---------------------|
| 210_1 (107)     | W              | 1.0 mm Be + 3.4 mm Al | 62.83                 | 83.02               |

|             |   |                       |       |       |
|-------------|---|-----------------------|-------|-------|
| 210_2 (108) | W | 4.8 mm Be + 4.0 mm Al | 55.41 | 79.04 |
|-------------|---|-----------------------|-------|-------|

**Table S23.** Characteristics of X-ray tubes and spectra generated at a fixed 220 kVp voltage.

| Spectrum number | Anode material | Filtration system     | Effective energy, keV | Average energy, keV |
|-----------------|----------------|-----------------------|-----------------------|---------------------|
| 220_1 (144)     | W              | 7.1 mm Be + 0.3 mm Cu | 23.67                 | 68.22               |
| 220_2 (146)     | W              | 4.1 mm Be + 0.2 mm Cu | 56.20                 | 80.26               |
| 220_3 (166)     | W              | 0.5 mm Cu             | 72.63                 | 91.19               |
| 220_4 (167)     | W              | 4.05 mm Al            | 53.31                 | 73.58               |

**Table S24.** Characteristics of X-ray tubes and spectra generated at a fixed 225 kVp voltage.

| Spectrum number | Anode material | Filtration system     | Effective energy, keV | Average energy, keV |
|-----------------|----------------|-----------------------|-----------------------|---------------------|
| 225_1 (7)       | W              | 0.1 mm Be             | 7.93                  | 50.62               |
| 225_2 (41)      | W              | 1.0 mm Al + 0.9 mm Cu | 3.82                  | 50.25               |
| 225_3 (139)     | W              | 0.5 mm Cu + 4.0 mm Al | 18.01                 | 72.73               |

**Table S25.** Characteristics of X-ray tube and spectrum generated at a fixed 240 kVp voltage.

| Spectrum number | Anode material | Filtration system     | Effective energy, keV | Average energy, keV |
|-----------------|----------------|-----------------------|-----------------------|---------------------|
| 240_1 (8)       | W              | 4.1 mm Be + 0.6 mm Cu | 16.95                 | 74.41               |

**Table S26.** Characteristics of X-ray tubes and spectra generated at a fixed 250 kVp voltage.

| Spectrum number | Anode material | Filtration system                 | Effective energy, keV | Average energy, keV |
|-----------------|----------------|-----------------------------------|-----------------------|---------------------|
| 250_1 (6)       | W              | 0.4 mm Sn + 0.35 mm Cu            | 7.97                  | 54.63               |
| 250_2 (72)      | W              | 2.91 mm Cu + 1.02 mm Al           | 133.51                | 131.41              |
| 250_3 (81)      | W              | 1.6 mm Cu + 4.0 mm Al             | 113.76                | 120.39              |
| 250_4 (133)     | W              | 0.01 mm Cu + 0.02 mm Al           | 22.14                 | 70.01               |
| 250_5 (134)     | W              | 0.01 mm Al + 0.01 mm Sn           | 24.55                 | 72.86               |
| 250_6 (261)     | W              | 3.0 mm Pb + 2.0 mm Sn + 4.0 mm Al | 179.65                | 188.12              |

**Table S27.** Characteristics of X-ray tubes and spectra generated at a fixed 260 kVp voltage.

| Spectrum number | Anode material | Filtration system     | Effective energy, keV | Average energy, keV |
|-----------------|----------------|-----------------------|-----------------------|---------------------|
| 260_1 (109)     | W              | 5.5 mm Be + 0.2 mm Al | 25.92                 | 65.22               |
| 260_2 (110)     | W              | 6.5 mm Be + 0.3 mm Al | 29.78                 | 66.41               |

**Table S28.** Characteristics of X-ray tube and spectrum generated at a fixed 280 kVp voltage.

| Spectrum number | Anode material | Filtration system     | Effective energy, keV | Average energy, keV |
|-----------------|----------------|-----------------------|-----------------------|---------------------|
| 280_1 (82)      | W              | 4.0 mm Al + 3.0 mm Cu | 141.76                | 141.93              |

**Table S29.** Characteristics of X-ray tubes and spectra generated at a fixed 300 kVp voltage.

| Spectrum number | Anode material | Filtration system      | Effective energy, keV | Average energy, keV |
|-----------------|----------------|------------------------|-----------------------|---------------------|
| 300_1 (5)       | W              | 0.3 mm Be + 0.5 mm Cu  | 7.98                  | 62.24               |
| 300_2 (73)      | W              | 2.9 mm Cu + 1.02 mm Al | 149.34                | 144.93              |
| 300_3 (74)      | W              | 4.0 mm Sn + 4.0 mm Al  | 191.80                | 186.84              |
| 300_4 (119)     | W              | 2.5 mm Cu + 4.0 mm Al  | 10.25                 | 66.94               |
| 300_5 (122)     | W              | 6.5 mm Sn + 4.0 mm Al  | 30.59                 | 75.09               |

|              |   |                                      |        |        |
|--------------|---|--------------------------------------|--------|--------|
| 300_6 (124)  | W | 4.1 mm Be + 0.4 mm Cu                | 83.06  | 102.77 |
| 300_7 (126)  | W | 1.1 mm Be + 0.1 mm Cu                | 29.56  | 72.25  |
| 300_8 (129)  | W | 4.1 mm Al                            | 63.21  | 85.79  |
| 300_9 (254)  | W | 3.0 mm Cu + 4.0 mm Al                | 148.12 | 147.06 |
| 300_10 (260) | W | 5.0 mm Pb + 3.0 mm Sn +<br>4.0 mm Al | 234.76 | 235.62 |
